# Supplementary material for: Tripling the reverse electrodialysis power generation in conical nanochannels utilizing soft surfaces
Source: Royal Society of Chemistry journal article supplement (doi:10.1039/d0cp05974a), 2020-12-22
Supplement: d0cp05974a1.pdf [file d0cp05974a1.pdf]

## Supplementary Information

# Tripling the Reverse Electrodialysis Power Generation in Conical Nanochannels Utilizing Soft Surfaces

Mahdi Khatibi<sup>a</sup>, Arman Sadeghi<sup>b</sup>, Seyed Nezameddin Ashrafizadeh<sup>a,\*</sup>

<sup>a</sup> *Research Lab for Advanced Separation Processes, Department of Chemical Engineering, Iran University of Science and Technology, Narmak, Tehran 16846-13114, Iran*

<sup>b</sup> *Department of Mechanical Engineering, University of Kurdistan, Sanandaj 66177-15175, Iran*

The present model performance was validated by comparing the model predictions with the experimental data of Laucirica et al.<sup>1</sup>. In the work conducted by Laucirica et al., a bullet-shaped nanochannel was fabricated via track etching method in a polyethylene terephthalate (PET) foil of 12  $\mu\text{m}$  thickness. The base radius ( $R_B$ ) of the nanochannel was approximately 95 nm and the surface of the nanochannel was cation selective. To compare the model outputs with the experimental data of Laucirica et al.<sup>1</sup>, it was assumed that the diffusion of ions occurs from the base-end reservoir towards the tip-end reservoir ( $C_H > C_L$ ). Moreover, the geometric parameters of the nanochannel system were considered as:  $R_T = 10$  nm,  $L_R = R_R = 200$  nm,  $L_N = 1200$  nm,  $R_B = 95$  nm,  $R_S = 5$  nm, and  $C_H/C_L = 1000$ . In addition, the volumetric PEL fixed charge density was considered to be  $N_{PEL}/N_A = 126$  molm<sup>-3</sup>, the value which is equal to the charge density of a pH-responsive rigid nanochannel at pH = 10. It should be noted that the nanochannel used in the experimental work is solid-state, so the value chosen for the soft layer charge density was equivalent to the surface charge density of the solid-state nanochannel. Fig. S1

---

\* Corresponding author: [ashrafi@iust.ac.ir](mailto:ashrafi@iust.ac.ir) (S.N. Ashrafizadeh)

Co-authors: [m\\_khatibi@chemeng.iust.ac.ir](mailto:m_khatibi@chemeng.iust.ac.ir) (M. Khatibi); [a.sadeghi@eng.uok.ac.ir](mailto:a.sadeghi@eng.uok.ac.ir) (A. Sadeghi)

compares the power output predicted by the present theoretical model with the experimental data of Laucirica et al.<sup>1</sup>. As demonstrated in Fig. S1, our model successfully reproduces the experimental data of Laucirica et al.<sup>1</sup>. This indicates that the present model provides close-to-reality predictions, and the conclusions made in the current study, including the maximum power generation improvement by covering the nanochannel inner surface with PELs, is practically achievable.

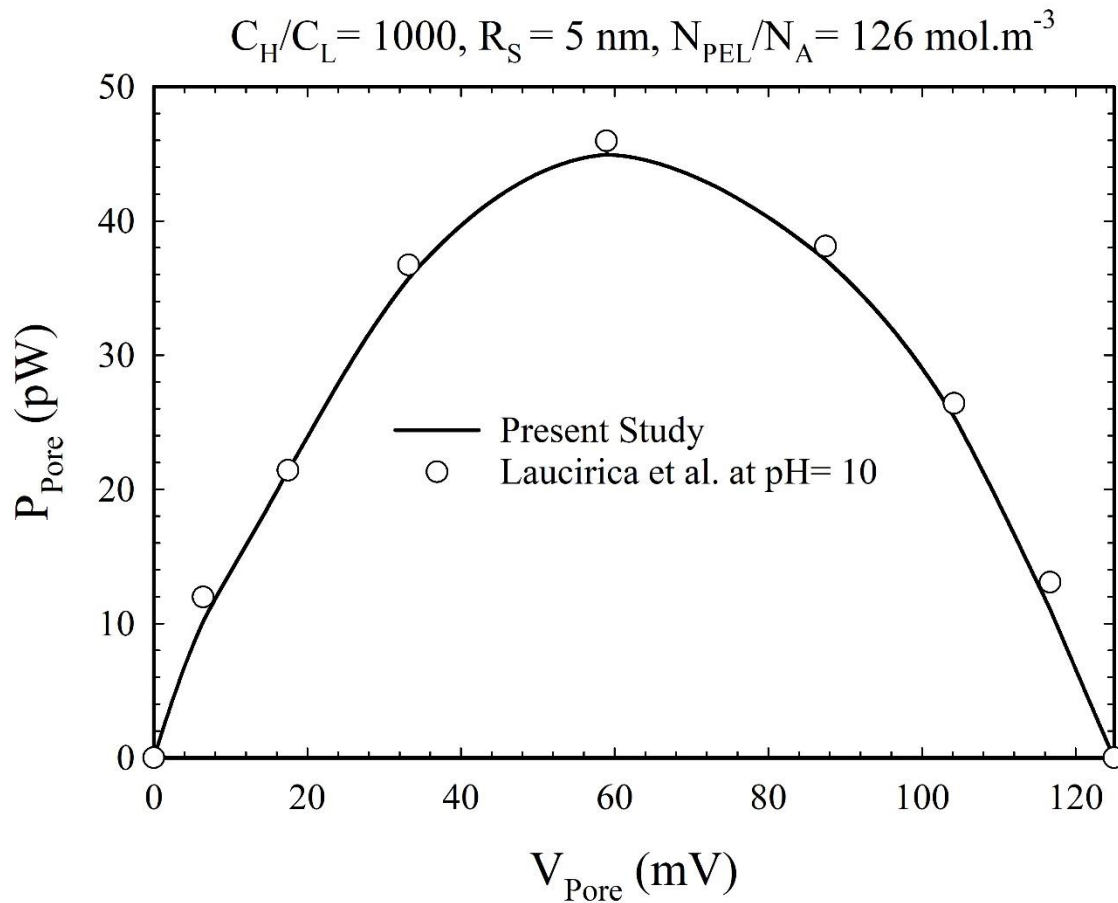

**Fig. S1.** Comparison of the voltage-power results predicted by the present model and the experimental data of Laucirica et al.<sup>1</sup>.

### References

1. G. Laucirica, A. G. Albesa, M. E. Toimil-Molares, C. Trautmann, W. A. Marmisollé and O. Azzaroni, *Nano Energy*, 2020, **71**, 104612.
